# High acceptability of newborn screening for sickle cell disease among post-natal mothers in western Kenya

John Orimbo<sup>1\*</sup> Shehu Shagari Awandu<sup>1</sup>, Faith Muhonja<sup>2</sup>, Patrick Owili<sup>3</sup>, Dickens Omondi<sup>1</sup>

<sup>1</sup>Department of Biomedical and Nursing Sciences, School of Health Sciences, Jaramogi Oginga Odinga University of Science and Technology, Bondo, Kenya

<sup>2</sup>Department of Public Health, Amref International University

<sup>3</sup>African Population and Health Research Centre

\*Corresponding Author: John Orimbo. Email: [jguda006@gmail.com](mailto:jguda006@gmail.com)

## Abstract

**Background:** Sickle cell disease is a genetically inherited blood disorder that manifests early in life with resultant significant health complications. Globally, nearly three quarters of all affected babies are in sub-Saharan Africa. Early identification of babies with sickle cell disease through newborn screening followed by early linkage to care is recommended. However, the program has not been widely adopted in the sub-Saharan Africa. Evidence on acceptability of newborn screening to scale up newborn screening program is scarce. This study assessed factors associated with acceptability of newborn screening among mothers of newborns delivered at Homa Bay county teaching and referral hospital, western Kenya.

**Methods:** This study employed a cross-sectional design among postnatal mothers at Homa Bay county teaching and referral hospital with 399 postnatal mothers enrolled into the study. A semi-structured questionnaire was used for data collection. Maternal sociodemographic characteristics, knowledge, and perception were assessed. Babies were also screened for sickle cell disease using Sickle SCAN point-of-care test. The acceptability was calculated as percentage of mothers accepting to have their babies screened. Data were analyzed using logistic regression to explore factors associated with acceptability of newborn screening for sickle cell disease.

**Results:** Ninety-four percent of mothers accepted newborn screening for sickle cell disease. Mother's age and occupation were significantly associated with acceptability of newborn screening for sickle cell disease. Younger mothers (OR=3.01;95%CI=1.16-7.83;  $p=0.024$ ) and being a student (OR= 6.18; 95%CI= 1.18-32.22;  $p=0.031$ ) were significant at bivariate regression analysis. Only being a student (aOR= 25.02; 95% CI=1.29-484.51;  $p= 0.033$ ) was significant at multivariate logistic regression analysis.

**Conclusion:** The acceptability of newborn screening for sickle cell disease is high in the county. The Homabay county and the Kenyan ministry of health should implement routine newborn screening for sickle cell disease in all level 2-6 hospitals.

**Key words:** Sickle Cell Disease Acceptability Newborn Screening Postnatal mothers

45 **Introduction**

46  
47 Sickle cell disease (SCD) is a major genetically inherited blood disorder, caused by autosomal  
48 recessive inheritance, that manifests early in life with resultant significant health complications.  
49 Globally, nearly three quarters of all sickle cell disease-affected babies are in sub-Saharan Africa  
50 (Uyoga et al., 2019). In 2011, the World Health Organization (WHO) recommended an increased  
51 awareness, improved access to health services, and provision of technical support for prevention  
52 and management of sickle cell disease (Makani et al., 2013). Programs such as newborn screening  
53 for sickle cell disease have shown great success towards preventing and managing the disease  
54 (Nnodu et al., 2018). However, only a few countries in Africa have piloted the screening program  
55 and none has scaled up the implementation (Inusa et al., 2015; Ohene-Frempong et al., 2008;  
56 Tshilolo et al., 2009). Successful implementation of newborn screening for sickle cell disease  
57 followed by early initiation of penicillin prophylaxis, pneumococcal vaccines, and hydroxyurea  
58 treatment are likely to reduce the disease burden in low- and middle-income countries (LMICs).

59  
60 Nonetheless, limited data on the prevalence of sickle cell disease at birth in Africa makes it difficult  
61 to quantify the magnitude of the disease burden. Additionally, approximately 90% of the children  
62 with sickle cell disease die before their fifth birthday, partly because of late diagnosis (Katamea et  
63 al., 2022). This can be solved through adequate implementation of newborn screening for sickle  
64 cell disease. This implementation however, heavily depends on its acceptability (Sekhon et al.,  
65 2017) and socio-cultural settings (Bediako & Neblett, 2011), which vary from one community or  
66 region to another. Unacceptability of the screening program for sickle cell disease by the parents  
67 or caregivers or authorities in Africa can greatly hinder effective implementation of the program  
68 (Inusa et al., 2015). There is need to assess the acceptability of the program before its  
69 implementation which may not only promote public participation but also community ownership  
70 of the intervention.

71  
72 The prevalence of sickle cell disease varies on the malaria endemicity patterns. The disease burden  
73 in Kenya is quite high especially around the lake regions in western as well as the Coastal regions  
74 (Ministry of Health, 2020). The prevalence of sickle cell disease around western Kenya is about  
75 4.5% for sickle cell disease, and 18% for sickle cell trait (Wanjiku et al., 2019).

76

77 Homa Bay county is yet to implement newborn screening for sickle cell disease. This is despite  
78 the high prevalence of sickle cell disease among infants who were accessing maternal and child  
79 health services in the county, which was found to be at 9.6% (Wanjiku et al., 2018). Routine  
80 newborn screening for sickle cell disease is recommended in regions where sickle cell disease  
81 prevalence at birth is 0.05% or more (DeBaun & Galadanci, 2022). There is however, paucity of  
82 data on the acceptability of newborn screening in the county. Acceptability is important for  
83 successful implementation of the intervention program (Sekhon et al., 2017). Additionally,  
84 extrapolating data from another county may not be feasible owing to the variable nature of  
85 acceptability (Marsh et al., 2011).

86  
87 Here, we assessed the acceptability of newborn screening for sickle cell disease and its associated  
88 factors in Homa Bay County, Western Kenya. This is important in promoting the establishment of  
89 a systematic newborn screening program for sickle cell disease in Homa Bay County, and  
90 subsequently a successful implementation of the intervention (Sekhon et al., 2017). The results of  
91 this study are critical to the ministry of health at the county-level for planning of the sickle cell  
92 disease screening program in the county.

## 93 94 **Methods**

### 95 96 **Study design, study population and study setting**

97 This study employed a cross-sectional design at the postnatal wards in the Homa Bay county  
98 teaching and referral hospital, Homa Bay County, western Kenya. Homa Bay county teaching and  
99 referral hospital is the county referral hospital with a wider catchment across the eight sub counties  
100 in Homa Bay county. The study involved postnatal mothers in the postnatal wards between 14<sup>th</sup>  
101 April 2023 and 15<sup>th</sup> June 2023. The site has a sickle cell disease clinic however, it lacks newborn  
102 screening for sickle cell disease implementation.

### 103 104 **Sample size and sampling technique**

105 Cochran's formula for calculating the sample when the population is infinite was used. A  
106 maximum variability of 50% was used to estimate the maximum sample size required since the  
107 acceptability of newborn screening for sickle cell disease was unknown in Homa Bay County. The  
108 final sample size was 403 mothers, after adjusting for 5% non-response. Consecutive sampling

109 technique, where all participants meeting eligibility criteria were enrolled until required sample is  
110 achieved, was used to select the participants. All postnatal mothers available at the postnatal ward  
111 during the study period, and willing to take part in our study and met the inclusion criteria were  
112 selected and enrolled. The inclusion criteria were: The postnatal mother giving an informed  
113 consent or assent to participate in the study and whose outcome of delivery was an alive infant.  
114 Postnatal mothers who were medically unstable to respond to the questionnaire or needed urgent  
115 critical care were excluded from participating in the study.

116

### 117 **Data collection tools**

118

119 Kobo collect tool was used to collect the data using a semi-structured questionnaire with five sub-  
120 sections. The first section collected demographic information: Maternal age, marital status,  
121 occupation, religion, education level and parity. The second section contained questions on the  
122 knowledge (awareness) of the mother about sickle cell disease including ever having heard of or  
123 being aware of sickle cell disease, being aware of their haemoglobin status, knowledge about sickle  
124 cell disease being a blood disorder, knowledge on transmission of sickle cell disease, when it can  
125 be diagnosed and knowledge on the existence of newborn screening for sickle cell disease  
126 programs. The third section contained the questions on the perceptions of the newly delivered  
127 mothers. The perception was measured by asking question on their opinion on to when screening  
128 for sickle cell disease should be done, ethical issues and the perceived effectiveness of the newborn  
129 screening for sickle cell disease. The perception was considered good when in line with the  
130 national government newborn screening policy. The fourth section of the questionnaire explored  
131 the possible intervening variables mainly, the cultural issues around newborn screening and the  
132 role of the male partner in making the decision as to whether to accept newborn screening for  
133 sickle cell disease. The fifth section collected data on their intent/willingness to have their  
134 newborns screened and those who were willing had their newborns screened using sickle SCAN  
135 kit (BioMedomics Inc, NC, USA). The sickle SCAN test kit is capable of identifying Hemoglobin  
136 A, S and C variants in blood samples. The sex of the newborns was also captured here.

137

### 138 **Enrollment and Data collection**

139 A total of 399 participants were enrolled into the study, representing 99% response rate. Eligible  
140 participants provided written informed consent for mothers who were 18 years and above. Minor

141 mothers also were provided with a signed assent. The participants were provided with a copy of  
142 the signed consent form and another copy retained by the investigator. After consenting, a semi-  
143 structured questionnaire was administered to each participant by the research assistants. The  
144 research assistants comprised of 1 clinical officer/physician assistant, 2 nurses, 1 laboratory  
145 technician and 2 counsellors. The principal investigator trained the research assistants prior to the  
146 start of the study and supervised data collection. The mothers were finally questioned on their  
147 intent/willingness to have their newborns screened. Willing participants had their babies screened  
148 for sickle cell disease using the Sickle SCAN® point-of-care test following manufacturer's  
149 instructions (BioMedomics Inc.,NC, United States). The results were interpreted as sickle cell trait  
150 with 3 lines visible at the control, HbA and HbS; sickle cell disease when two lines appeared at  
151 the control and HbS or no haemoglobinopathy when two lines at the control and HbA. The  
152 laboratory technician conducted the screening test by the bedside following the manufacturer's  
153 instructions. The newborns' heels were pricked using 1.2mm lancet pricker, and 2 drops of blood  
154 collected directly into the device. The results were ready in 3-5 minutes. The counsellors offered  
155 psychological counselling to all the mothers pretest and to mothers whose babies had sickle cell  
156 trait or sickle cell disease post-test. The mothers whose newborns screened positive for sickle cell  
157 disease were referred to the sickle cell disease comprehensive clinic and also received  
158 psychological counselling from the study team.

159

### 160 **Statistical analyses**

161 The data were entered into excel for cleaning before analysis using STATA version 16.0  
162 (StataCorp, 2019). The level of acceptability of newborn screening for sickle cell disease was  
163 analyzed using descriptive statistics only. Even though acceptability is a multidimensional  
164 construct, in this study it was defined as the willingness of the mother to accept newborn screening  
165 for sickle cell disease. The percentage acceptability, calculated as the percentage of mothers who  
166 agreed to have their newborns screened for sickle cell disease, was calculated.

167 The factors associated with acceptability of newborn screening for sickle cell disease were  
168 analyzed using both descriptive statistics and inferential statistics. Descriptively, proportions of  
169 acceptability among various factors were calculated and represented in a table. Inferentially, Chi-  
170 square and Fisher's exact test (where at least a cell has a count less than 5) were used to assess the  
171 association between the sociodemographic, maternal knowledge and maternal perception

172 characteristics and the acceptability of newborn screening for sickle cell disease. The factors that  
173 had statistically significant association with acceptability were further analyzed using logistic  
174 regression analysis to establish the point estimate and the magnitude of association. After the  
175 unadjusted analysis, statistically significant variables, were fit into a multivariate logistics  
176 regressions model using forward stepwise regression approach. Both unadjusted and adjusted odds  
177 ratio (OR) and 95% confidence intervals (95% CI) were reported. The results of the newborn  
178 screening were used to calculate the prevalence of sickle cell disease and sickle cell trait among  
179 the newborns.

## 180 **Results**

### 181 **Summary of participant characteristics**

182 The mean age of the mothers was 26.2 years (SD 6.07) with 25-34 years being modal age-group,  
183 comprising 44.1% of the respondents. Majority (300/399; 75%) of respondents were married;  
184 59.7% (238/399) had one or 2 children; 41.4% (165/399) had attained secondary level education  
185 while, 70% were engaged in either informal or no employment. Only 2 mothers (0.5%) reported  
186 to have had a previous child with Sickle cell disease. Majority (371/399; 93%) of the respondents  
187 had ever heard about sickle cell disease; only 4% knew their sickle cell disease status with only  
188 2% having ever been screened for sickle cell disease before; over 90%(362/399) knew the cause  
189 of sickle cell disease; only 7%(28/399) of respondents believed that sickle cell disease was as a  
190 result of God's will with less than 2%(5/399) believing sickle cell disease was due to God's  
191 punishment or evil spirits and majority (386/399;96.7%) belived the best timing for sickle cell  
192 disease testing was during the postnatal period (Table 1).

**Table 1: Characteristics of Postnatal Mothers (N=399) at Homay Bay County Teaching and Referral Hospital, western Kenya**

| Variable Characteristic | Frequency | Percentage |
|-------------------------|-----------|------------|
| <b>Age group</b>        |           |            |
| 11-24                   | 175       | 43.9       |
| 25-34                   | 176       | 44.1       |
| ≥35 years               | 48        | 12.0       |
| <b>Education</b>        |           |            |
| Tertiary                | 120       | 30.1       |
| Secondary               | 165       | 41.4       |
| Primary                 | 112       | 28.1       |
| No Education            | 2         | 0.5        |

### **Marital Status**

|                                       |     |      |
|---------------------------------------|-----|------|
| Married                               | 300 | 75.2 |
| Widowed                               | 5   | 1.3  |
| Separated                             | 21  | 5.3  |
| Never married                         | 73  | 18.3 |
| <b>Occupation</b>                     |     |      |
| Student                               | 72  | 18.1 |
| Formal employment                     | 40  | 10.0 |
| Informal employment                   | 226 | 56.6 |
| No employment                         | 61  | 15.3 |
| <b>Religion</b>                       |     |      |
| Roman Catholic                        | 73  | 18.3 |
| Protestant                            | 206 | 51.6 |
| Pentecostal                           | 55  | 13.8 |
| Muslim                                | 6   | 1.5  |
| Others                                | 59  | 14.8 |
| <b>Parity</b>                         |     |      |
| One child                             | 141 | 35.3 |
| Two children                          | 97  | 24.3 |
| Three children                        | 80  | 20.1 |
| Four children and above               | 81  | 20.3 |
| <b>Child with sickle cell disease</b> |     |      |
| Yes                                   | 2   | 0.5  |
| No                                    | 397 | 99.5 |
| <b>Death of child under 2 years</b>   |     |      |
| Yes                                   | 29  | 7.3  |
| No                                    | 370 | 92.7 |

193  
194  
195  
196  
197  
198  
199  
200

**Level of acceptability of newborn screening for sickle cell disease among postnatal mothers at Homabay County Teaching and Referral Hospital, western Kenya**

Out of the total 399 mothers interviewed, 375/399 (94.0%) agreed to have their newborns screened for sickle cell disease using the sickle scan point of care kit (Fig. 1). The level of acceptability was therefore 94.0%.

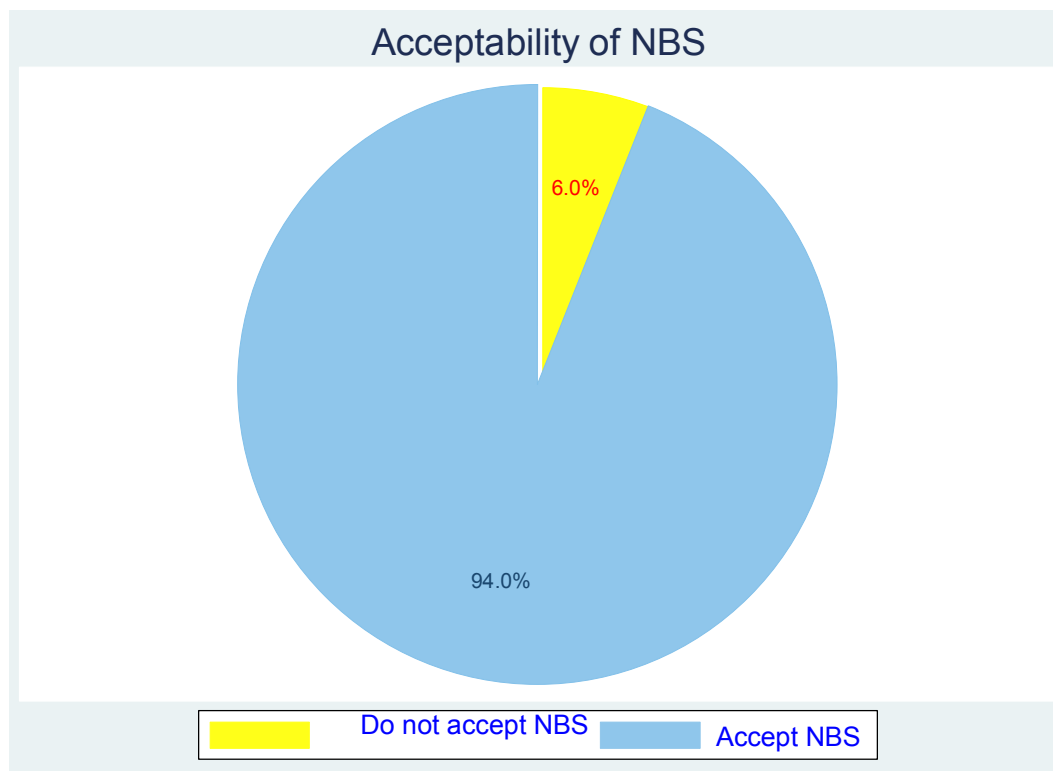

201  
202 *Figure 1: Pie chart showing acceptability of New Born Screening for Sickle Cell Disease among*  
203 *postnatal mothers in Homa Bay County Teaching and Referral Hospital, western Kenya*  
204

205 **Association between sociodemographic characteristics and acceptability of newborn**  
206 **screening for Sickle cell disease among postnatal mothers at Homabay County Teaching and**  
207 **Referral Hospital, western Kenya**

208 Chi-square method was used to assess association between the sociodemographic characteristics  
209 of the respondents and their acceptability of newborn screening for sickle cell disease. Maternal  
210 occupation ( $p= 0.026$ ) and maternal age ( $p= 0.023$ ) were the only factors that had statistically  
211 significant association with the acceptability of newborn screening for sickle cell disease.  
212 Respondents who were students and those younger than 25 years were more likely to accept  
213 newborn screening for sickle cell disease. The student as an occupation category comprised  
214 mothers who were school going and therefore not in any other occupation. Characteristically in  
215 this study, about 90% (65/72) were younger than 25 years. Majority of the students 91%(66/72)  
216 had post primary education, with the modal group in secondary schools. The odds of accepting  
217 newborn screening for sickle cell disease among student postnatal mothers was higher than those  
218 in formal employment (OR=6.18; 95%CI=1.18-32.22;  $p= 0.031$ ). Mothers younger than 25 years  
219 of age had higher odds of accepting newborn screening for sickle cell disease than older mothers



220 (OR=3.01;95%CI=1.16-7.83;  $p= 0.024$ ). No significant association was found between  
 221 acceptability of newborn screening for sickle cell disease and other sociodemographic  
 222 characteristics. (Table 2).

223

224

**Table 2: Association between acceptability of newborn screening for sickle cell disease and Sociodemographic characteristics of postnatal mothers at Homabay County Teaching and Referral Hospital, western Kenya**

| Characteristic                                  | NBS YES    | NBS NO   | X <sup>2</sup><br>value | df | p-value |
|-------------------------------------------------|------------|----------|-------------------------|----|---------|
| <b>Marital Status*</b>                          |            |          |                         |    |         |
| Married                                         | 279(93.00) | 21(7.00) |                         |    |         |
| Widowed                                         | 5(100.00)  | 0(0.00)  |                         | 3  | 0.181   |
| Separated                                       | 19(90.48)  | 2(9.52)  |                         |    |         |
| Never married                                   | 72(98.63)  | 1(1.37)  |                         |    |         |
| <b>Education (highest completed)</b>            |            |          |                         |    |         |
| Tertiary                                        | 110(91.67) | 10(8.33) |                         |    |         |
| Secondary                                       | 158(95.76) | 7(4.24)  | 2.06                    | 1  | 0.357   |
| Primary                                         | 107(93.86) | 7(6.14)  |                         |    |         |
| <b>Religion*</b>                                |            |          |                         |    |         |
| Roman Catholic                                  | 69(94.52)  | 4(5.48)  |                         |    |         |
| Protestant                                      | 192(93.20) | 14(6.80) |                         | 4  | 0.341   |
| Pentecostal                                     | 51(92.73)  | 4(7.23)  |                         |    |         |
| Muslim                                          | 5(83.33)   | 1(16.67) |                         |    |         |
| Others                                          | 58(98.31)  | 1(1.69)  |                         |    |         |
| <b>Parity</b>                                   |            |          |                         |    |         |
| One child                                       | 135(95.74) | 6(4.26)  |                         |    |         |
| Two children                                    | 92(94.85)  | 5(5.15)  |                         | 3  | 0.369   |
| Three children                                  | 72(90.00)  | 8(10.00) |                         |    |         |
| Four children and above                         | 76(93.83)  | 5(6.17)  |                         |    |         |
| <b>Age group*</b>                               |            |          |                         |    |         |
| 11-24                                           | 169(96.57) | 7(3.43)  |                         |    |         |
| 25-34                                           | 159(90.34) | 17(9.66) |                         | 2  | 0.023   |
| ≥35                                             | 47(97.52)  | 1(2.48)  |                         |    |         |
| <b>Previous Child with sickle cell disease*</b> |            |          |                         |    |         |
| Yes                                             | 2(100.00)  | 0(0.00)  |                         | 1  | 1.000   |
| No                                              | 373(93.95) | 24(6.05) |                         |    |         |
| <b>Occupation*</b>                              |            |          |                         |    |         |
| Student                                         | 70(97.22)  | 2(2.78)  |                         |    |         |

|                                               |            |          |   |       |
|-----------------------------------------------|------------|----------|---|-------|
| Formal employment                             | 34(85.00)  | 6(15.00) | 3 | 0.026 |
| Informal employment                           | 211(93.36) | 15(6.64) |   |       |
| Unemployed                                    | 60(98.36)  | 1(1.64)  |   |       |
| <b>Previous Death of child under 2 years*</b> |            |          |   |       |
| Yes                                           | 28(96.55)  | 1(3.45)  | 1 | 0.546 |
| No                                            | 347(93.78) | 23(6.22) |   |       |

225 \*Fisher's exact method used where cell contain value <5, p-value<0.05

226

227 **Association between maternal knowledge and acceptability of newborn screening for sickle**  
 228 **cell disease among postnatal mothers at Homabay County Teaching and Referral Hospital,**  
 229 **western Kenya**

230 Fisher's exact method was used to assess the association between maternal knowledge, measured  
 231 by finding what they know about sickle cell disease as shown in table 3 below, and the acceptability  
 232 of newborn screening for sickle cell disease since the criteria for chi-square was not met. Most of  
 233 the cells had values less than 5. No statistically significant association was found between maternal  
 234 knowledge dimensions and acceptability of newborn screening for sickle cell disease. Most of the  
 235 mothers had ever heard about sickle cell disease and knew it is a non-contagious blood disorder.  
 236 However, only few mothers had ever been screened for sickle cell disease nor knew their sickle  
 237 cell disease status. Most had good knowledge of the inheritance patterns of sickle cell disease and  
 238 nearly two thirds had never heard about newborn screening for sickle cell disease before (Table  
 239 3).

240

**Table 3: Association between acceptability of newborn screening for sickle cell disease and knowledge of postnatal mothers at Homabay County Teaching and Referral Hospital, western Kenya**

| Characteristics                | NBS YES    | NBS NO    | P-value |
|--------------------------------|------------|-----------|---------|
| <b>Ever heard about SCD</b>    |            |           | 1.000   |
| Yes                            | 348(93.80) | 23 (6.20) |         |
| No                             | 27(96.40)  | 1(3.60)   |         |
| <b>Knowledge of SCD status</b> |            |           | 0.612   |
| Yes                            | 16(100.00) | 0(0.00)   |         |
| No                             | 359(93.70) | 24(6.30)  |         |
| <b>Ever screened for SCD</b>   |            |           | 1.000   |
| Yes                            | 8(100.00)  | 0(0.00)   |         |
| No                             | 367(93.90) | 24(6.10)  |         |
| <b>SCD is blood disorder</b>   |            |           | 1.000   |
| Yes                            | 340(93.10) | 22(6.10)  |         |
| No                             | 35(94.60)  | 2(5.40)   |         |
| <b>SCD is contagious</b>       |            |           | 1.000   |
| Yes                            | 6(100.00)  | 0(0.00)   |         |

|                                  |            |          |       |
|----------------------------------|------------|----------|-------|
| No                               | 369(93.90) | 24(6.10) |       |
| <b>Maternal inheritance only</b> |            |          | 1.000 |
| Yes                              | 2(100.00)  | 0(0.00)  |       |
| No                               | 373(94.00) | 24(6.00) |       |
| <b>Paternal inheritance only</b> |            |          | 1.000 |
| Yes                              | 1(100.00)  | 0(0.00)  |       |
| No                               | 374(94.00) | 24(6.00) |       |
| <b>Heard about SCD screening</b> |            |          | 0.079 |
| Yes                              | 129(97.00) | 4(3.00)  |       |
| No                               | 246(92.30) | 20(7.70) |       |

241 *Fisher's exact method used, p-value <0.05*

242

243 **Association between acceptability of newborn screening for sickle cell disease and perception**  
 244 **of postnatal mothers at Homabay County Teaching and Referral Hospital, western Kenya**

245

246 Fisher's exact method was used to assess the association between maternal perception and the  
 247 acceptability of newborn screening for sickle cell disease since the criteria for chi-square test was  
 248 not met. Most of the cells had values less than 5. No statistically significant association was found  
 249 between maternal perceptions and acceptability of newborn screening for sickle cell disease.  
 250 Postnatal mothers however had good perception about sickle cell disease. Most of the postnatal  
 251 mothers had good perception of what causes sickle cell disease, with most believing that the best  
 252 time to screen for sickle cell disease is during the newborn period (0-6 weeks). Majority of the  
 253 postnatal mothers believed newborn screening for sickle cell disease was morally right and would  
 254 be useful in controlling the disease (Table 4).

255

**Table 4: Association between acceptability of newborn screening for sickle cell disease and perception of postnatal mothers at Homabay County Teaching and Referral Hospital, western Kenya**

| Characteristics                          | NBS YES    | NBS NO   | p-value |
|------------------------------------------|------------|----------|---------|
| <b>SCD occur due to God's will</b>       |            |          | 1.000   |
| True                                     | 27(96.43)  | 1(3.57)  |         |
| False                                    | 348(93.80) | 23(6.20) |         |
| <b>SCD occur due to God's punishment</b> |            |          | 0.268   |
| True                                     | 4(80.00)   | 1(20.00) |         |
| False                                    | 371(94.16) | 23(5.84) |         |
| <b>SCD occur due to evil spirit</b>      |            |          | 0.268   |
| True                                     | 4(80.00)   | 1(20.00) |         |

|                                          |            |          |       |
|------------------------------------------|------------|----------|-------|
| False                                    | 371(94.16) | 23(5.84) |       |
| <b>Best timing for SCD Screening</b>     |            |          | 0.180 |
| Prenatally                               | 4(100.00)  | 0(0.00)  |       |
| 0-6 weeks                                | 364(94.30) | 22(5.70) |       |
| > 6 weeks                                | 7(77.78)   | 2(22.22) |       |
| <b>NBS for SCD is morally right</b>      |            |          | 0.312 |
| True                                     | 370(94.15) | 23(5.85) |       |
| False                                    | 5(83.33)   | 1(16.67) |       |
| <b>NBS is useful for controlling SCD</b> |            |          | 1.000 |
| True                                     | 360(93.75) | 24(6.25) |       |
| False                                    | 15(100.00) | 0(0.00)  |       |

256 *Fisher's exact method used, p-value < 0.05*

257

258

259 **Multivariate logistic regression analysis of factors with significant association with**  
 260 **acceptability of newborn screening for sickle cell disease at bivariate analysis**

261 Only being a student (aOR= 25.02; 95% CI=1.29-484.51;  $p= 0.033$ ) was significant at multivariate  
 262 logistic regression analysis, though with a wide confidence interval. Male partner support was  
 263 found to be a strong modifying factor with positive effect (coef=7.50; std error=1.31;95%CI=4.94-  
 264 10.07;  $p<0.001$ ). In the multivariate model, the coefficient of determination( $r^2$ ) was found to be  
 265 63.9% (Table 5).

266

**Table 5: Bivariate and Multivariate logistic regression analysis model of acceptability of newborn screening for sickle cell disease**

| Characteristic          | Unadjusted model |            |         | Adjusted model |             |         |
|-------------------------|------------------|------------|---------|----------------|-------------|---------|
|                         | OR               | 95%CI      | P-value | aOR            | 95%CI       | P-value |
| <b>Occupation</b>       |                  |            |         |                |             |         |
| Formal employment       | REF              |            |         | REF            |             |         |
| student                 | 6.18             | 1.18-32.22 | 0.031   | 25.02          | 1.29-484.51 | 0.033   |
| Informal employment     | 2.48             | 0.90-6.84  | 0.079   | 10.14          | 1.67-61.36  | 0.012   |
| No employment           | 10.59            | 1.22-91.67 | 0.032   | 19.24          | 0.97-383.14 | 0.053   |
| <b>Age category</b>     |                  |            |         |                |             |         |
| 24-35                   | REF              |            |         | REF            |             |         |
| ≤24 years               | 3.01             | 1.16-7.83  | 0.024   | 0.44           | 0.07-2.64   | 0.365   |
| ≥35 years               | 5.03             | 0.65-38.76 | 0.121   | 0.65           | 0.06-6.89   | 0.720   |
| <b>Cultural support</b> |                  |            |         |                |             |         |
| No                      | REF              |            |         | REF            |             |         |
| yes                     | 4.32             | 1.13-16.49 | 0.032   | 0.24           | 0.01-5.89   | 0.380   |

**Male partner support**

|     |       |         |       |        |          |       |
|-----|-------|---------|-------|--------|----------|-------|
| No  | REF   |         |       | REF    |          |       |
|     | 559.5 | 105.46- | <0.00 | 1816.9 | 139.34-  | <0.00 |
| Yes | 0     | 2968.41 | 1     | 1      | 23691.24 | 1     |

267 *Table legend: model variable significant at 95% CI; p= 0.05; R<sup>2</sup>= 63.9%*

268  
269  
270

271 **Discussion**

272 The acceptability of newborn screening for sickle cell disease observed in the current study sample  
273 was relatively high (94%). Comparatively, a similar study conducted at the postnatal wards at  
274 Kisumu county referral hospital, Kenya, previously observed newborn screening for sickle cell  
275 disease acceptability of 99.4% (Kuta et al., 2019). This informed successful implementation of  
276 routine NBS for SCD in Kisumu County. The two studies are both hospital-based with similar  
277 design and thus the comparable acceptability. Studies from Nigeria (Oluwole *et al.* 2020;Nnodu  
278 *et al.* 2018) observed 86% acceptability of NBS which is below the acceptability in this current  
279 study but is still comparable. The difference between the current study and that of Nnodu and team  
280 in Nigeria was target population of postnatal mothers while that in Nigeria was conducted in health  
281 institutions and University with diverse target groups.

282

283 Similar studies conducted in Gabon (Mombo et al., 2021) showed low acceptability rates of about  
284 30% despite satisfactory knowledge among the respondents, demonstrating wide variabilities  
285 (Marsh et al., 2011). The reason for the huge difference in the level of acceptability was that most  
286 mothers in Gabon feared blood collection from their newborns (Mombo et al., 2021). This was not  
287 the case in Homabay. There were obvious variations across socio-economic and demographic  
288 stages, with younger single mothers being more receptive. Awareness and knowledge levels as  
289 well as availability and access to services in high burden areas have been observed to influence  
290 acceptability (Nnodu et al., 2018).

291

292 Despite the high willingness of the service recipient, other factors not explored in this study such  
293 as cost barriers and service availability remain import factors in the overall evaluation of the  
294 intervention acceptability. It is important for policy development to make the intervention

295 universally available and accessible in the county (Gates et al., 2021). Such a policy is currently  
296 not in place in the county even though health is a devolved function.

297

298 Awareness about the intervention or the existence of the intervention helps improve acceptability  
299 since those with low knowledge or awareness are less likely to accept the interventions. It will be  
300 important that prior to implementation of the newborn screening programme in the county,  
301 adequate awareness creation is created, and cost barriers eliminated. This has improved  
302 acceptability in the HIV care set up (Izizag *et al.*, 2018) and can be extrapolated to sickle cell  
303 disease care.

304

305 Primary interventions such as newborn screening programme are highly recommended to avert  
306 disease complications and early deaths. Acceptance of health technologies is necessary for  
307 progressive adoption and continued use by consumers as well as for its implementation at scale  
308 (Kuta et al., 2019). Despite the relatively high acceptability rate, which might imply higher  
309 willingness for newborn screening by the recipients, recent studies in Africa show that acceptance  
310 for newborn screening is diverse and variable over time across different population groups as well  
311 as the implementation contexts (Sekhon *et al.*, 2017; Katamea *et al.*, 2022). This might be  
312 accounted for by the fact that health technology acceptance is a dynamic concept, and evolves  
313 sequentially through a continuum of stages including, pre-use acceptability; initial use  
314 acceptability and sustained use acceptability. However, few studies exist on the pre-use health  
315 technology acceptance in Africa (Sekhon et al., 2017). The current study examined pre-use  
316 acceptability. Whether high acceptability across these stages necessarily translates to scalability  
317 remains a multidimensional challenge.

318

319 This study found out that occupation was strongly associated with acceptability of newborn  
320 screening for sickle cell disease. Those in formal employment were less likely to accept newborn  
321 screening for sickle cell disease when compared to the students and those in other occupations.  
322 This is comparable to the findings of Nnodu et al. in a multicenter survey in Nigeria (Nnodu et al.,  
323 2018). The similarities in both studies was the cross sectional design. The study in Nigeria was  
324 however a multicenter study both in health institutions and universities. This provides a diverse  
325 context to confirm the finding. However, contrasting findings were found by Katamea et al. in DRC

326 (Katamea et al., 2022) and Ahmed et al. in Nigeria (Ahmed et al., 2021) where occupation was not  
327 associated with acceptability. This current study differed with the DRC study in that this was  
328 hospital-based study with only postnatal mothers responding to the questionnaire while that of  
329 DRC had all adults participate and it was a community survey. This could have contributed to the  
330 differences in findings since not all those adults interviewed were having children. Either, most  
331 students are usually younger and thus they may have been left out of the survey disproportionately.  
332 The students in this study were predominantly younger and younger age has been associated with  
333 increased acceptability of newborn screening for sickle cell disease.

334  
335 Maternal age was found to be a strong predictor of acceptability of newborn screening for sickle  
336 cell disease. Mothers who were younger than 25 years were found to be 3 times more likely to  
337 accept newborn screening than those older. This finding is comparable to the findings of Mombo  
338 et al. in a study done in Gabon where mothers younger than 29 years were more likely to accept  
339 newborn screening than those older than 29 years (Mombo et al., 2021). Similarly, a study by  
340 Nnodu et al. in Nigeria found that mothers younger than 21 years were more likely to accept  
341 newborn screening for SCD than older ones (Nnodu et al., 2018). Younger women were thought  
342 to be less culturally bound and therefore more likely to accept newborn screening for SCD  
343 (Mombo et al., 2021). All the 3 studies above had an aspect of hospital-based interviews thus likely  
344 the similarity in finding about the age.

345  
346 Male partner support was found in this study to improve the odds of acceptability of newborn  
347 screening for SCD across the various occupational categories. Male partner support may reflect  
348 not only mutual consensus on decisions regarding the health interventions but also, potential  
349 influence (Dsouza et al., 2022). It is therefore important to involve males in planning of  
350 implementation of health interventions such as this (Mboane & Bhatta, 2015).

351  
352 The multivariate model in this study had the significant factors explaining up to 63% of the variable  
353 relationships. The unexplained 37% is likely due to unexplored factors. Review of previous similar  
354 studies conducted (Katamea et al., 2022; Mombo et al., 2021) shows diverse factors may be  
355 involved but there is no consensus on how different factors interact to influence or potentially  
356 affect maternal acceptability of the newborn screening for SCD.

357  
358 The study also found that the confidence intervals for most of the odds ratios of the associated  
359 factors were very wide. This typically occur due to reasonably high variability in the factor  
360 characteristics within the community of study (Marsh et al., 2011) and likely lower sample size,  
361 even though this was above the minimum calculated sample size. However, this may also, result  
362 from study limitations in that, in as much as acceptability is a multidimensional aspect, only  
363 willingness was assessed.

364  
365 The study limitations included sampling from one health facility within the county thus the mothers  
366 coming from near the health facility could have contributed disproportionately in numbers.  
367 However, conducting the study at the county referral hospital was to allow for a representation  
368 from all other 8 sub counties within the county with each subcounty contributing at least 5% of the  
369 total sample. The assessment of acceptability in a unidimensional approach as opposed to the  
370 multidimensional approach was another limitation. However, this was done to allow the  
371 comparison with other similar studies.

372  
373

### 374 **Conclusion**

375 The acceptability of Newborn screening for Sickle cell disease among the postnatal mothers in  
376 Homa Bay County was high, mainly among younger mothers. Male partner support was a strong  
377 motivating factor for newborn screening acceptability with positive effect. The high acceptability  
378 is indicative of a willingness for screening for sickle cell and is necessary for scaled up  
379 programming. Implementation of routine newborn screening program for sickle cell disease is  
380 highly recommended in view of the good user acceptability and high prevalence of sickle cell  
381 disease at birth in the county. Additionally, there is need to explore other determinants of  
382 acceptability and how they impact on acceptability and actual uptake.

383

### 384 **List of abbreviations**

385 aOR: Adjusted Odds Ratio  
386 CI: Confidence Interval  
387 EC: Ethics Committee  
388 JOOUST: Jaramogi Oginga Odinga Teaching University of Science and Technology



389 NACOSTI: National Commission Of Science, Technology and Innovation

390 NBS: Newborn Screening

391 OR: Odds Ratio

392 SCD: Sickle Cell Disease

393 SCT: Sickle Cell trait

394 SSA: Sub-Saharan Africa

## 395 **Declarations**

### 396 **Ethical approval and consent to participate**

397 The proposal was approved by the board of postgraduate studies of Jaramogi Oginga Odinga  
398 University of Science and Technology. Ethical approval for the study was obtained by JOOUST  
399 Ethics Committee (ERC 36/02/23-33) and the NACOSTI permit obtained the National  
400 Commission of Science, Technology and Innovation (Research License 101836). Using the  
401 approvals from the Ethic Committee (EC) and NACOSTI, the County authorization was obtained  
402 from the County Health Management Team and the County Director of Medical Services and  
403 notice issued to the Hospital management and the relevant department. The research assistants  
404 signed a confidentiality agreement form before starting the data collection and were adequately  
405 trained to minimize any potential harm to the participants. Informed consent was obtained from  
406 the study participants prior to any study procedure. The data collected was kept confidential and,  
407 in a password-protected computer. Data was entered directly into the password-protected computer  
408 with limited access. The access of the research assistants was terminated immediately data  
409 cleaning was complete. No paper data was intended for the study. Key personal identifying  
410 information such as name of the participant were not captured in order to deidentify the participant  
411 and minimize chances of harm from breach of confidentiality. Mothers of newborns who were  
412 willing to have their newborns screened were offered psychological counselling pre and post the  
413 test and those whose newborns screened positive and need advanced psychological counseling  
414 were referred to the counselling department of the Homa Bay County Teaching and Referral  
415 hospital. The newborns who screened positive for SCD were linked with the SCD clinic of the  
416 Homa Bay County Teaching and Referral Hospital for early initiation of comprehensive care,  
417 usually initiated at the age of 2 months. The mothers of the newborns who were found to have  
418 SCT were offered genetic counselling. The risk to the newborns screened for SCD included  
419 minimal pain, swelling and bruise at the sample collection site due to the prick but this was

420 minimized by having the blood sample collected by adequately trained and professional research  
421 assistants with experience in neonatal blood sampling from the heels. The heel prick was done  
422 while maintaining the infection prevention control measures like adequate sterilization of the prick  
423 site to minimize chances of prick site infection.

424

425

#### 426 **Consent for publication**

427 Not applicable

428

#### 429 **Competing interests**

430 The authors declare they have no competing interests

431

#### 432 **Acknowledgment**

433 We acknowledge the postnatal mothers who consented to take part in the study which may improve  
434 the policy on newborn screening and the care of patients with sickle cell disease and the research  
435 assistants who helped with data collection.

436

#### 437 **Funding**

438 This data collection for Msc program was funded by The European and Developing Countries  
439 Clinical Trials Partnership (EDCTP) through the African Population and Health Research Centre  
440 (APHRC), Lund University, Jaramogi Oginga Odinga University of Science and Technology and  
441 Amref International University.

442

#### 443 **Availability of data and materials**

444 The datasets used and/or analysed during the current study are available from the corresponding  
445 author on reasonable request.

446

#### 447 **Authors Contributions**

448 JO conceptualized the idea, drafted the protocol, collected data, did data analysis and wrote the  
449 manuscript.

450 SA did critical review of the protocol and guided its writing, reviewed data collection tools, did  
451 data analysis and reviewed the manuscript.

452 FM did critical review of the protocol and guided its writing, reviewed data collection tools, did  
453 data analysis and reviewed the manuscript.

454 PO did critical review of the protocol and guided its writing, reviewed data collection tools, did  
455 data analysis and reviewed the manuscript.

456 DO did critical review of the protocol and guided its writing, reviewed data collection tools, did  
457 data analysis and reviewed the manuscript.

458

459

## 460 **References**

461

462 Bediako, S. M., & Neblett, E. W. (2011). Optimism and Perceived Stress in Sickle-Cell Disease:

463 The Role of an Afrocultural Social Ethos. *Journal of Black Psychology*, 37(2), 234–253.

464 <https://doi.org/10.1177/0095798410385681>

465 DeBaun, M. R., & Galadanci, N. A. (2022). *Sickle cell disease in sub-Saharan Africa*. 39.

466 Dsouza, J. P., Van Den Broucke, S., Pattanshetty, S., & Dhoore, W. (2022). Factors explaining  
467 men's intentions to support their partner's participation in cervical cancer screening. *BMC*

468 *Women's Health*, 22(1), 443. <https://doi.org/10.1186/s12905-022-02019-y>

469 Gates, A., Gates, M., Rahman, S., Guitard, S., MacGregor, T., Pillay, J., Ismail, S. J., Tunis, M.

470 C., Young, K., Hardy, K., Featherstone, R., & Hartling, L. (2021). A systematic review of

471 factors that influence the acceptability of vaccines among Canadians. *Vaccine*, 39(2), 222–

472 236. <https://doi.org/10.1016/j.vaccine.2020.10.038>

473 Inusa, B. P., Juliana Olufunke, Y. D., & John Dada, L. (2015). Sickle Cell Disease Screening in

474 Northern Nigeria: The Co-Existence of  $\hat{I}$ '-Thalassemia Inheritance. *Pediatrics &*

475 *Therapeutics*, 05(03). <https://doi.org/10.4172/2161-0665.1000262>

476 Izizag, B. B., Situakibanza, H., Mbutiwi, T., Ingwe, R., Kiazayawoko, F., Nkodila, A., Mandina,

477 M., Longokolo, M., Amaela, E., & Mbula, M. (2018). Factors associated with acceptability

478 of HIV self-testing (HIVST) among university students in a Peri-Urban area of the  
479 Democratic Republic of Congo (DRC). *Pan African Medical Journal*, 31.  
480 <https://doi.org/10.11604/pamj.2018.31.248.13855>

481 Katamea, T., Mukuku, O., Mpoy, C. W., Mutombo, A. K., Luboya, O. N., & Wembonyama, S. O.  
482 (2022). Factors Associated with Acceptability of Newborn Screening for Sickle Cell  
483 Disease in Lubumbashi City, Democratic Republic of the Congo. *Global Journal of*  
484 *Medical, Pharmaceutical, and Biomedical Update*, 17, 5.  
485 [https://doi.org/10.25259/GJMPBU\\_7\\_2022](https://doi.org/10.25259/GJMPBU_7_2022)

486 Kuta, E. S. M., Tenge, C. N., Ganda, B. K. O., & Njuguna, F. M. (2019). Newborn screening for  
487 sickle cell disease at Kisumu county hospital, Kisumu -Kenya. *East African Medical*  
488 *Journal*, 96(2), 2419–2429. CABDirect.  
489 <https://www.ajol.info/index.php/eamj/article/view/198133>

490 Makani, J., Ofori-Acquah, S. F., Nnodu, O., Wonkam, A., & Ohene-Frempong, K. (2013). Sickle  
491 Cell Disease: New Opportunities and Challenges in Africa. *The Scientific World Journal*,  
492 2013, 1–16. <https://doi.org/10.1155/2013/193252>

493 Marsh, V. M., Kamuya, D. M., & Molyneux, S. S. (2011). ‘All her children are born that way’:  
494 Gendered experiences of stigma in families affected by sickle cell disorder in rural Kenya.  
495 *Ethnicity & Health*, 16(4–5), 343–359. <https://doi.org/10.1080/13557858.2010.541903>

496 Mboane, R., & Bhatta, M. P. (2015). Influence of a husband’s healthcare decision making role on  
497 a woman’s intention to use contraceptives among Mozambican women. *Reproductive*  
498 *Health*, 12(1), 36. <https://doi.org/10.1186/s12978-015-0010-2>

499 *Ministry of Health 2020 (Sickle Cell Disease Guidelines—Kenya).*  
500

- 501 Misati Akuma, J. (2015). Socio-cultural and family change in Africa: Implications for adolescent  
502 socialization in Kisii County, South Western, Kenya. *Les Cahiers d'Afrique de L'Est*, 50,  
503 80–98. <https://doi.org/10.4000/estafrica.296>
- 504 Mombo, L. E., Makosso, L. K., Bisseye, C., Mbacky, K., & Edou, A. (2021). *Acceptability of*  
505 *neonatal sickle cell disease screening among parturient women at the Paul Moukambi*  
506 *Regional Hospital in rural Eastern Gabon, Central Africa*. 6.
- 507 Nnodu, O. E., Adegoke, S. A., Ezenwosu, O. U., Emodi, I. I., Ugwu, N. I., Ohiaeri, C. N., Brown,  
508 B. J., Olaniyi, J. A., Isa, H., Okeke, C. C., Bene, B. A., Balongun, M. T., Okocha, E. O.,  
509 Aneke, J. C., Lawson, J. O. J., Usman, A. M., Diaku-Akinmumi, I. N., Okolo, A. A., Israel-  
510 Aina, Y. T., ... Adekile, A. D. (2018). A Multi-centre Survey of Acceptability of Newborn  
511 Screening for Sickle Cell Disease in Nigeria. *Cureus*. <https://doi.org/10.7759/cureus.2354>
- 512 Odunvbun, M. E., Okolo, A. A., & Rahimy, C. M. (2008). Newborn screening for sickle cell  
513 disease in a Nigerian hospital. *Public Health*, 122(10), 1111–1116.  
514 <https://doi.org/10.1016/j.puhe.2008.01.008>
- 515 Ohene-Frempong, K., Oduro, J., Tetteh, H., & Nkrumah, F. (2008). SCREENING NEWBORNS  
516 FOR SICKLE CELL DISEASE IN GHANA. *Pediatrics*, 121(Supplement\_2), S120–S121.  
517 <https://doi.org/10.1542/peds.2007-2022UUU>
- 518 Oluwole, E. O., Adeyemo, T. A., Osanyin, G. E., Odukoya, O. O., Kanki, P. J., & Afolabi, B. B.  
519 (2020). Feasibility and acceptability of early infant screening for sickle cell disease in  
520 Lagos, Nigeria—A pilot study. *PLOS ONE*, 15(12), e0242861.  
521 <https://doi.org/10.1371/journal.pone.0242861>

- 522 Sekhon, M., Cartwright, M., & Francis, J. J. (2017). Acceptability of healthcare interventions: An  
523 overview of reviews and development of a theoretical framework. *BMC Health Services*  
524 *Research*, 17(1), 88. <https://doi.org/10.1186/s12913-017-2031-8>
- 525 Tshilolo, L., Aissi, L. M., Lukusa, D., Kinsiama, C., Wembonyama, S., Gulbis, B., & Vertongen,  
526 F. (2009). Neonatal screening for sickle cell anaemia in the Democratic Republic of the  
527 Congo: Experience from a pioneer project on 31 204 newborns. *Journal of Clinical*  
528 *Pathology*, 62(1), 35–38. <https://doi.org/10.1136/jcp.2008.058958>
- 529 Uyoga, S., Macharia, A. W., Mochamah, G., Ndila, C. M., Nyutu, G., Makale, J., Tendwa, M.,  
530 Nyatichi, E., Ojal, J., Otiende, M., Shebe, M., Awuondo, K. O., Mturi, N., Peshu, N., Tsofa,  
531 B., Maitland, K., Scott, J. A. G., & Williams, T. N. (2019). The epidemiology of sickle cell  
532 disease in children recruited in infancy in Kilifi, Kenya: A prospective cohort study. *The*  
533 *Lancet Global Health*, 7(10), e1458–e1466. [https://doi.org/10.1016/S2214-](https://doi.org/10.1016/S2214-109X(19)30328-6)  
534 [109X\(19\)30328-6](https://doi.org/10.1016/S2214-109X(19)30328-6)
- 535 Wanjiku, C. M., Njuguna, F., Asirwa, F. C., Njuguna, C., Roberson, C., & Greist, A. (2018).  
536 Validation and Feasibility of a Point of Care Screening Test for Sickle Cell Disease in a  
537 Resource Constrained Setting—A New Frontier. *Blood*, 132(Supplement 1), 2229–2229.  
538 <https://doi.org/10.1182/blood-2018-99-118876>
- 539
